# Supplementary material for: Humoral immunoresponse elicited against an adenoviral-based SARS-CoV-2 coronavirus vaccine in elderly patients
Source: PubMed Central journal article supplement (PMC9550251; doi:10.18632/aging.204299), 2022-09-21
Supplement: aging-14-204299-s001.pdf [file aging-14-204299-s001.pdf]

SUPPLEMENTARY FIGURE

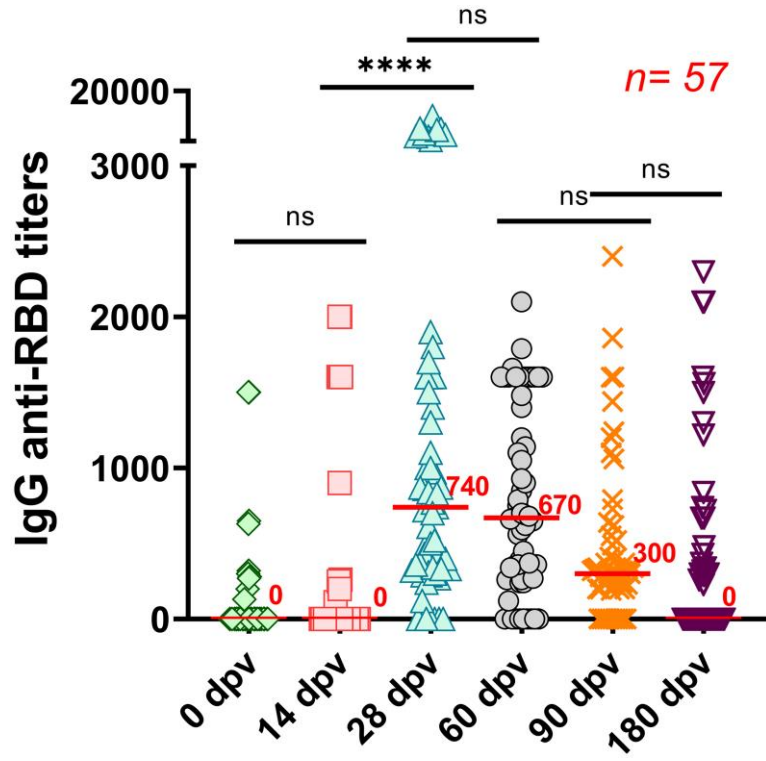

**Supplementary Figure 1. Longitudinal analysis of humoral immune response against SARS-Cov-2 in 57 elderly individuals.** Ig anti-RBD antibodies were determined in serum samples taken at 0, 14, 28, 60, 90 and 180 days' post-vaccination (dpv) by an "in house" ELISA platform.
